# Supplementary material for: A pro-inflammatory role for Th22 cells in Helicobacter pylori-associated gastritis
Source: HighWire-hosted journal article supplement (doi:10.1136/gutjnl-2014-307020), 2014-08-18
Supplement: gutjnl-2014-307020supp_table2.pdf [file gutjnl-2014-307020supp_table2.pdf]

|                         |          |     |     |     |     |     |     | anis<br>m |     |     |     |     | p   |     |     | sp  |     |     |     |     |
|-------------------------|----------|-----|-----|-----|-----|-----|-----|-----------|-----|-----|-----|-----|-----|-----|-----|-----|-----|-----|-----|-----|
| IL<br>-2<br>2<br>K<br>O | 05.04.14 | neg       | neg | neg | neg | neg | neg | neg | neg | neg | neg | neg | neg | neg |
|                         | 08.12.13 | neg       | neg | neg | neg | neg | neg | neg | neg | neg | neg | neg | neg | neg |
|                         | 07.08.13 | neg       | neg | neg | neg | neg | neg | neg | neg | neg | neg | neg | neg | neg |
|                         | 04.04.13 | neg       | neg | neg | neg | neg | neg | neg | neg | neg | neg | neg | neg | neg |
|                         | 09.12.12 | neg       | neg | neg | neg | neg | neg | neg | neg | neg | neg | neg | neg | neg |
|                         | 06.08.12 | neg       | neg | neg | neg | neg | neg | neg | neg | neg | neg | neg | neg | neg |
|                         | 05.04.12 | neg       | neg | neg | neg | neg | neg | neg | neg | neg | neg | neg | neg | neg |

|                         | Date     | HM<br>V | Sen<br>dai | MP<br>V | TM<br>EV | LC<br>MV | MN<br>V | Tyz<br>zer'<br>s<br>org<br>anis<br>m | C.<br>kutc<br>. | P.<br>pne<br>u. | Sal<br>mo<br>nell<br>a sp | E<br>coli<br>O-1<br>15 | Heli<br>cob<br>acte<br>r sp<br>p | M.<br>pul<br>m. | G.<br>mur<br>i. | Tric<br>ho<br>mo<br>nas<br>sp | Ent<br>am<br>oeb<br>a sp | P.<br>cari. | Syp<br>haci<br>a sp | A.<br>tetr. |
|-------------------------|----------|---------|------------|---------|----------|----------|---------|--------------------------------------|-----------------|-----------------|---------------------------|------------------------|----------------------------------|-----------------|-----------------|-------------------------------|--------------------------|-------------|---------------------|-------------|
| IL<br>-2<br>3<br>k<br>o | 06.04.14 | neg     | neg        | neg     | neg      | neg      | neg     | neg                                  | neg             | neg             | neg                       | neg                    | neg                              | neg             | neg             | neg                           | neg                      | neg         | neg                 | neg         |
|                         | 09.12.13 | neg     | neg        | neg     | neg      | neg      | neg     | neg                                  | neg             | neg             | neg                       | neg                    | neg                              | neg             | neg             | neg                           | neg                      | neg         | neg                 | neg         |
|                         | 08.08.13 | neg     | neg        | neg     | neg      | neg      | neg     | neg                                  | neg             | neg             | neg                       | neg                    | neg                              | neg             | neg             | neg                           | neg                      | neg         | neg                 | neg         |
|                         | 05.04.13 | neg     | neg        | neg     | neg      | neg      | neg     | neg                                  | neg             | neg             | neg                       | neg                    | neg                              | neg             | neg             | neg                           | neg                      | neg         | neg                 | neg         |
|                         | 10.12.12 | neg     | neg        | neg     | neg      | neg      | neg     | neg                                  | neg             | neg             | neg                       | neg                    | neg                              | neg             | neg             | neg                           | neg                      | neg         | neg                 | neg         |
|                         | 07.08.12 | neg     | neg        | neg     | neg      | neg      | neg     | neg                                  | neg             | neg             | neg                       | neg                    | neg                              | neg             | neg             | neg                           | neg                      | neg         | neg                 | neg         |
|                         | 06.04.12 | neg     | neg        | neg     | neg      | neg      | neg     | neg                                  | neg             | neg             | neg                       | neg                    | neg                              | neg             | neg             | neg                           | neg                      | neg         | neg                 | neg         |

Note. mouse hepatitis virus, HMV; Sendai virus, Sendai; Mouse pneumonitis virus, MPV; Theller murine encephalomyelitis virus, TMEV; lymphocytic choriomeningitis virus, LCMV; mouse norovirus, MNV; *Corynebacterium kutcheri*, *C. kutc.*; *Pasteurella pneumotropica*, *P. pneu.*; *Salmonella* sp; *E coli* O-115; *Helicobacter* spp; *Mycoplasma pulmonis*, *M. pulm.*; *Giardia muris*, *G. muri.*; *Trichomonas* sp; *Entamoeba* sp; *Pneumocystis carinii*, *P. cari.*; *Syphacia* sp; *Aspicularis tetraptera*, *A. tetr.*
