# Supplementary material for: A pro-inflammatory role for Th22 cells in Helicobacter pylori-associated gastritis
Source: HighWire-hosted journal article supplement (doi:10.1136/gutjnl-2014-307020), 2014-08-18
Supplement: gutjnl-2014-307020supp_table3.pdf [file gutjnl-2014-307020supp_table3.pdf]

**Supplementary Table 3.** Primer and probe sequences for real-time PCR analysis

| Gene                          | Primer or probe | Sequence 5'→3'                  |
|-------------------------------|-----------------|---------------------------------|
| <i>H. pylori</i> 16S rDNA     | forward         | TTTGTTAGAGAAGATAATGACGGTATCTAAC |
|                               | reverse         | CATAGGATTTACACCTGACTGACTATC     |
|                               | probe           | CGTGCCAGCAGCCGCGGT              |
| <i>H. pylori</i> <i>cagA</i>  | forward         | GAGTCATAATGGCATAGAACCTGAA       |
|                               | reverse         | TTGTGCAAGAAATTCCATGAAA          |
| Human $\beta$ -actin          | forward         | TTCCTTCTGGGCATGGAGTCC           |
|                               | reverse         | TGGCGTACAGGTCTTTGCGG            |
| Human IL-22                   | forward         | GACAAGTCCAACCTCCAG              |
|                               | reverse         | GCTCACTCATACTGACTC              |
| Human IL-22R1                 | forward         | AGCCCTGCAAGGCAGAAATG            |
|                               | reverse         | GATTGTGAACTGGCCAGGAATG          |
| Human CXCL2                   | forward         | CCCAAGTTAGTTCAATCCTG            |
|                               | reverse         | TTCTCAGCCTCTATCACAG             |
| Mouse $\beta$ 2-microglobulin | forward         | CCTGCAGAGTTAAGCATGCCAG          |
|                               | reverse         | TGCTTGATCACATGTCTCGATCC         |
|                               | probe           | TGGCCGAGCCCAAGACCGTCTAC         |
| Mouse Sry                     | forward         | TGGGACTGGTGACAATTGTC            |
|                               | reverse         | GAGTACAGGTGTGCAGCTCT            |
| Mouse IL-22                   | forward         | ATACATCGTCAACCGCACCTTT          |
|                               | reverse         | AGCCGGACATCTGTGTTGTTAT          |
| Mouse IL-22R1                 | forward         | CTACGTGTGCCGAGTGAAGA            |
|                               | reverse         | AAGCGTAGGGGTTGAAAGGT            |
| Mouse S100A8                  | forward         | GGAAATCACCATGCCCTCTAC           |
|                               | reverse         | GCCACACCCACTTTTATCACC           |
| Mouse S100A9                  | forward         | AACATCTGTGACTCTTTAGCCTTG        |
|                               | reverse         | ACTGTGCTTCCACCATTTGTCT          |

For the probes, a FAM fluorescent reporter is coupled to the 5' end, and a TAMRA quencher is coupled to the 3'

end.
